# Supplementary material for: Seed Weight and Genotype Influence the Total Oil Content and Fatty Acid Composition of Peanut Seeds
Source: MDPI journal article supplement (doi:10.3390/foods11213463), 2022-11-01
Supplement: s1 [file s1]

**Table S1.** Total oil content and individual and total fatty acid contents according to 100-seed weight.

| Parameters | Values | Group I            | Group II           | Group III                       | Group IV            | Group V            | P-value |
|------------|--------|--------------------|--------------------|---------------------------------|---------------------|--------------------|---------|
| TO (%)     | Range  | 45.48 – 64.55      | 44.59 – 53.55      | 45.18 – 58.68                   | 44.90 – 63.15       | 49.63 – 64.20      | ***     |
|            | Mean   | 49.67 <sup>b</sup> | 48.99 <sup>b</sup> | 49.32 <sup>b</sup>              | 50.50 <sup>b</sup>  | 53.91 <sup>a</sup> |         |
|            | CV (%) | 5.15               | 4.06               | 4.58                            | 6.73                | 10.94              |         |
| PA (%)     | Range  | 9.81 – 14.06       | 8.77 – 12.96       | 7.41 – 12.57                    | 8.21 – 12.23        | 7.97 – 9.35        | ***     |
|            | Mean   | 12.02 <sup>a</sup> | 10.83 <sup>b</sup> | 10.10 <sup>c</sup>              | 9.68 <sup>c</sup>   | 8.67 <sup>d</sup>  |         |
|            | CV (%) | 7.74               | 9.33               | 8.81                            | 9.71                | 6.11               |         |
| SA (%)     | Range  | 1.88 – 7.22        | 1.78 – 6.23        | 1.98 – 5.97                     | 2.54 – 5.82         | 4.07 – 6.27        | ***     |
|            | Mean   | 3.56 <sup>c</sup>  | 3.26 <sup>c</sup>  | 3.56 <sup>c</sup>               | 4.13 <sup>b</sup>   | 5.09 <sup>a</sup>  |         |
|            | CV (%) | 25.84              | 27.3               | 22.75                           | 19.37               | 16.5               |         |
| OA (%)     | Range  | 40.32 – 61.78      | 40.40 – 56.61      | 40.17 – 63.35                   | 43.05 – 61.88       | 53.31 – 62.25      | ***     |
|            | Mean   | 45.86 <sup>d</sup> | 50.3 <sup>c</sup>  | 53.16 <sup>b</sup> <sup>c</sup> | 54.51 <sup>ab</sup> | 56.45 <sup>a</sup> |         |
|            | CV (%) | 9.09               | 9.72               | 8.95                            | 7.47                | 6.24               |         |
| LA (%)     | Range  | 24.47 – 43.75      | 25.71 – 43.60      | 23.89 – 44.49                   | 22.54 – 40.88       | 21.66 – 31.62      | ***     |
|            | Mean   | 37.07 <sup>a</sup> | 34.17 <sup>b</sup> | 31.67 <sup>bc</sup>             | 30.25 <sup>cd</sup> | 28.23 <sup>d</sup> |         |
|            | CV (%) | 9.50               | 12.91              | 14.02                           | 12.43               | 13.67              |         |
| AA (%)     | Range  | 0.93 – 2.34        | 1.08 – 2.22        | 1.14 – 2.42                     | 1.03 – 1.86         | 1.36 – 1.86        | •       |
|            | Mean   | 1.49 <sup>a</sup>  | 1.43 <sup>a</sup>  | 1.51 <sup>a</sup>               | 1.42 <sup>a</sup>   | 1.57 <sup>a</sup>  |         |
|            | CV (%) | 16.11              | 16.08              | 15.23                           | 10.56               | 12.10              |         |
| OL (%)     | Range  | 0.93 – 2.53        | 0.93 – 2.20        | 0.90 – 2.65                     | 1.05 – 2.74         | 1.69 – 2.87        | ***     |
|            | Mean   | 1.26 <sup>d</sup>  | 1.51 <sup>c</sup>  | 1.73 <sup>b</sup>               | 1.84 <sup>ab</sup>  | 2.05 <sup>a</sup>  |         |
|            | CV (%) | 20.63              | 21.19              | 20.81                           | 19.02               | 22.93              |         |
| SFA (%)    | Range  | 13.29 – 21.31      | 13.02 – 19.6       | 12.77 – 17.77                   | 13.69 – 17.11       | 14.78 – 16.1       | ***     |
|            | Mean   | 17.07 <sup>a</sup> | 15.52 <sup>b</sup> | 15.17 <sup>b</sup>              | 15.23 <sup>b</sup>  | 15.32 <sup>b</sup> |         |
|            | CV (%) | 8.67               | 7.86               | 6.00                            | 5.38                | 3.66               |         |
| UFA (%)    | Range  | 78.69 – 86.71      | 80.40 – 86.98      | 82.23 – 87.23                   | 82.89 – 86.31       | 83.90 – 85.22      | ***     |
|            | Mean   | 82.93 <sup>b</sup> | 84.48 <sup>a</sup> | 84.83 <sup>a</sup>              | 84.77 <sup>a</sup>  | 84.68 <sup>a</sup> |         |
|            | CV (%) | 1.78               | 1.44               | 1.07                            | 0.97                | 0.67               |         |

TO = total oil, PA = palmitic acid, SA = stearic acid, OA = oleic acid, LA = linoleic acid, AA = arachidic acid, OL = oleic acid to linoleic acid ratio, SFA = total saturated fatty acid, UFA = total unsaturated fatty acid, CV = coefficient of variation. Group I, Group II, Group III, Group IV, and Group V represent the genotypes have a 100-seed weight of 25–45 g, 45–65 g, 65–85 g, 85–105 g, and 105–125 g, respectively. Values in the same row with different superscript letters are significantly different ( $p < 0.05$ ). •, \*\*\* represent significant at  $p < 0.1$ , 0.001, respectively.

**Table S2.** Pearson correlation coefficients of seed weight, total oil content, and individual and total fatty acid contents among the cultivar, breeding line, landrace, and unknown accession types.

|                               |     | TO      | PA       | SA       | OA       | LA       | AA       | OL       | SFA      | UFA     |
|-------------------------------|-----|---------|----------|----------|----------|----------|----------|----------|----------|---------|
| Cultivar<br>(n = 17)          | PA  | -0.45   |          |          |          |          |          |          |          |         |
|                               | SA  | 0.59*   | -0.43    |          |          |          |          |          |          |         |
|                               | OA  | 0.48    | -0.85*** | 0.35     |          |          |          |          |          |         |
|                               | LA  | -0.58*  | 0.75***  | -0.59*   | -0.94*** |          |          |          |          |         |
|                               | AA  | 0.35    | -0.16    | 0.60*    | 0.06     | -0.24    |          |          |          |         |
|                               | OL  | 0.61**  | -0.76*** | 0.54*    | 0.95***  | -0.99*** | 0.26     |          |          |         |
|                               | SFA | 0.11    | 0.56*    | 0.50*    | -0.50*   | 0.19     | 0.47     | -0.23    |          |         |
|                               | UFA | -0.11   | -0.56*   | -0.50*   | 0.50*    | -0.19    | -0.47    | 0.23     | -1.00*** |         |
|                               | SW  | 0.54*   | -0.77*** | 0.49*    | 0.63**   | -0.6*    | 0.09     | 0.59*    | -0.31    | 0.31    |
| Breeding<br>line<br>(n = 151) | PA  | -0.21** |          |          |          |          |          |          |          |         |
|                               | SA  | 0.15    | -0.52*** |          |          |          |          |          |          |         |
|                               | OA  | 0.17*   | -0.75*** | 0.36***  |          |          |          |          |          |         |
|                               | LA  | -0.16*  | 0.67***  | -0.50*** | -0.97*** |          |          |          |          |         |
|                               | AA  | 0.05    | -0.30*** | 0.58***  | 0.10     | -0.20*   |          |          |          |         |
|                               | OL  | 0.19*   | -0.71*** | 0.46***  | 0.98***  | -0.98*** | 0.19*    |          |          |         |
|                               | SFA | -0.09   | 0.59***  | 0.37***  | -0.49*** | 0.27***  | 0.36***  | -0.35*** |          |         |
|                               | UFA | 0.09    | -0.59*** | -0.37*** | 0.49***  | -0.27*** | -0.36*** | 0.35***  | -1.00*** |         |
|                               | SW  | 0.09    | -0.67*** | 0.36***  | 0.48***  | -0.41*** | -0.04    | 0.45***  | -0.43*** | 0.43*** |
| Landrace<br>(n = 61)          | PA  | 0.24    |          |          |          |          |          |          |          |         |
|                               | SA  | -0.15   | 0.08     |          |          |          |          |          |          |         |
|                               | OA  | -0.12   | -0.80*** | -0.38**  |          |          |          |          |          |         |
|                               | LA  | 0.12    | 0.74***  | 0.26*    | -0.98*** |          |          |          |          |         |
|                               | AA  | -0.17   | -0.07    | 0.64***  | -0.21    | 0.13     |          |          |          |         |
|                               | OL  | -0.07   | -0.74*** | -0.32*   | 0.98***  | -0.99*** | -0.17    |          |          |         |
|                               | SFA | 0.09    | 0.81***  | 0.64***  | -0.84*** | 0.72***  | 0.40**   | -0.76*** |          |         |
|                               | UFA | -0.10   | -0.81*** | -0.64*** | 0.85***  | -0.73*** | -0.40**  | 0.76***  | -1.00*** |         |
|                               | SW  | -0.17   | -0.67*** | -0.19    | 0.61***  | -0.55*** | -0.14    | 0.57***  | -0.63*** | 0.64*** |
| Unknown<br>(n = 72)           | PA  | 0.05    |          |          |          |          |          |          |          |         |
|                               | SA  | 0.20    | 0.20     |          |          |          |          |          |          |         |
|                               | OA  | 0.01    | -0.79*** | -0.23*   |          |          |          |          |          |         |
|                               | LA  | -0.06   | 0.68***  | 0.03     | -0.97*** |          |          |          |          |         |
|                               | AA  | -0.09   | -0.07    | 0.49***  | -0.04    | -0.07    |          |          |          |         |
|                               | OL  | 0.05    | -0.73*** | -0.16    | 0.98***  | -0.97*** | -0.03    |          |          |         |
|                               | SFA | 0.13    | 0.79***  | 0.74***  | -0.68*** | 0.48***  | 0.36**   | -0.60*** |          |         |
|                               | UFA | -0.13   | -0.79*** | -0.74*** | 0.68***  | -0.48*** | -0.36**  | 0.60***  | -1.00*** |         |
|                               | SW  | 0.00    | -0.46*** | -0.17    | 0.39***  | -0.32**  | -0.22    | 0.40***  | -0.44*** | 0.44*** |

SW = 100-seed weight, TO = total oil, PA = palmitic acid, SA = stearic acid, OA = oleic acid, LA = linoleic acid, AA = arachidic acid, OL = oleic acid to linoleic acid ratio, SFA = total saturated fatty acid, UFA = total unsaturated fatty acid. \*, \*\*, \*\*\* represent significant at  $p < 0.05$ , 0.01, 0.001, respectively.

**Table S3.** Principal component analysis of total oil, individual and total fatty acids of 301 peanut accessions, with eigenvalues and individual and cumulative contributions of variables in the first five principal components.

| Parameters      | PC1   | PC2   | PC3   | PC4   | PC5   |
|-----------------|-------|-------|-------|-------|-------|
| TO              | 0.40  | 2.11  | 92.35 | 2.14  | 2.88  |
| PA              | 16.97 | 1.53  | 0.14  | 16.88 | 15.95 |
| SA              | 0.07  | 36.97 | 0.04  | 0.01  | 39.96 |
| OA              | 19.86 | 0.79  | 0.21  | 5.94  | 2.21  |
| LA              | 16.93 | 4.29  | 0.26  | 13.68 | 3.61  |
| AA              | 0.02  | 25.81 | 6.99  | 34.21 | 31.54 |
| OL              | 18.17 | 2.82  | 0.01  | 9.42  | 3.20  |
| SFA             | 13.78 | 12.84 | 0.00  | 8.88  | 0.32  |
| UFA             | 13.79 | 12.83 | 0.00  | 8.84  | 0.33  |
| Eigenvalue      | 4.69  | 2.30  | 0.98  | 0.65  | 0.37  |
| Variability (%) | 52.09 | 25.53 | 10.93 | 7.19  | 4.08  |
| Cumulative (%)  | 52.09 | 77.62 | 88.54 | 95.74 | 99.82 |

TO = total oil, PA = palmitic acid, SA = stearic acid, OA = oleic acid, LA = linoleic acid, AA = arachidic acid, OL = oleic acid to linoleic acid ratio, SFA = total saturated fatty acid, UFA = total unsaturated fatty acid.

**Table S4.** Average cluster values of the seed weight, total oil content, and individual and total fatty acid contents of 301 peanut accessions.

| Cluster         | No. Acc.                  | SW                         | TO                        | PA                        | SA                        | OA                        |
|-----------------|---------------------------|----------------------------|---------------------------|---------------------------|---------------------------|---------------------------|
| I               | 120                       | 47.48 ± 16.31 <sup>c</sup> | 49.74 ± 2.63 <sup>b</sup> | 11.92 ± 0.90 <sup>a</sup> | 3.59 ± 0.87 <sup>b</sup>  | 44.99 ± 3.12 <sup>c</sup> |
| II              | 75                        | 65.48 ± 12.90 <sup>b</sup> | 48.22 ± 1.78 <sup>c</sup> | 10.42 ± 0.49 <sup>b</sup> | 2.92 ± 0.39 <sup>c</sup>  | 53.49 ± 2.87 <sup>b</sup> |
| III             | 106                       | 82.14 ± 14.20 <sup>a</sup> | 50.52 ± 2.89 <sup>a</sup> | 9.46 ± 0.73 <sup>c</sup>  | 4.19 ± 0.84 <sup>a</sup>  | 55.64 ± 2.67 <sup>a</sup> |
| <i>P</i> -value |                           | ***                        | *                         | ***                       | ***                       | ***                       |
| Cluster         | LA                        | AA                         | OL                        | SFA                       | UFA                       |                           |
| I               | 38.01 ± 3.12 <sup>a</sup> | 1.48 ± 0.23 <sup>ab</sup>  | 1.20 ± 0.19 <sup>c</sup>  | 16.99 ± 1.20 <sup>a</sup> | 83.01 ± 1.20 <sup>c</sup> |                           |
| II              | 31.74 ± 2.85 <sup>b</sup> | 1.43 ± 0.17 <sup>b</sup>   | 1.71 ± 0.25 <sup>b</sup>  | 14.77 ± 0.65 <sup>c</sup> | 85.23 ± 0.65 <sup>a</sup> |                           |
| III             | 29.21 ± 2.56 <sup>c</sup> | 1.51 ± 0.25 <sup>a</sup>   | 1.93 ± 0.27 <sup>a</sup>  | 15.15 ± 0.94 <sup>b</sup> | 84.85 ± 0.94 <sup>b</sup> |                           |
| <i>P</i> -value | ***                       | NS                         | ***                       | ***                       | ***                       |                           |

SW = 100-seed weight, TO = total oil, PA = palmitic acid, SA = stearic acid, OA = oleic acid, LA = linoleic acid, AA = arachidic acid, OL = oleic acid to linoleic acid ratio, SFA = total saturated fatty acid, UFA = total unsaturated fatty acid. Values in the same row with different superscript letters are significantly different ( $p < 0.05$ ). NS, \*, \*\*\* represent not significant or significant at  $p < 0.05$ , 0.001, respectively.

**Table S5.** Peanut genotypes used in this study.

| No | Genotype | No  | Genotype | No  | Genotype | No  | Genotype |
|----|----------|-----|----------|-----|----------|-----|----------|
| 1  | IT30815  | 76  | IT172536 | 151 | IT191622 | 226 | IT30881  |
| 2  | IT30842  | 77  | IT172538 | 152 | IT191625 | 227 | IT30885  |
| 3  | IT30844  | 78  | IT172540 | 153 | IT191626 | 228 | IT30915  |
| 4  | IT30854  | 79  | IT172541 | 154 | IT191627 | 229 | IT30917  |
| 5  | IT30863  | 80  | IT172542 | 155 | IT191628 | 230 | IT30918  |
| 6  | IT30919  | 81  | IT172543 | 156 | IT191629 | 231 | IT30920  |
| 7  | IT30929  | 82  | IT172545 | 157 | IT191630 | 232 | IT30921  |
| 8  | IT30960  | 83  | IT172548 | 158 | IT191631 | 233 | IT30922  |
| 9  | IT30962  | 84  | IT172553 | 159 | IT194509 | 234 | IT30925  |
| 10 | IT101139 | 85  | IT172554 | 160 | IT196366 | 235 | IT30932  |
| 11 | IT101146 | 86  | IT172556 | 161 | IT203648 | 236 | IT30935  |
| 12 | IT101172 | 87  | IT172562 | 162 | IT203650 | 237 | IT30956  |
| 13 | IT101184 | 88  | IT172572 | 163 | IT203652 | 238 | IT101182 |
| 14 | IT101204 | 89  | IT172600 | 164 | IT207978 | 239 | IT103386 |
| 15 | IT101210 | 90  | IT172610 | 165 | IT209224 | 240 | IT103417 |
| 16 | IT101216 | 91  | IT172626 | 166 | IT212142 | 241 | IT103961 |
| 17 | IT101229 | 92  | IT172628 | 167 | IT212145 | 242 | IT105693 |
| 18 | IT108816 | 93  | IT172642 | 168 | IT212146 | 243 | IT110215 |
| 19 | IT110209 | 94  | IT172657 | 169 | IT212147 | 244 | IT110216 |
| 20 | IT110210 | 95  | IT172658 | 170 | IT212148 | 245 | IT110220 |
| 21 | IT110211 | 96  | IT172670 | 171 | IT212149 | 246 | IT110236 |
| 22 | IT110212 | 97  | IT172672 | 172 | IT212150 | 247 | IT110957 |
| 23 | IT110218 | 98  | IT172673 | 173 | IT212151 | 248 | IT112892 |
| 24 | IT110219 | 99  | IT172681 | 174 | IT212152 | 249 | IT113440 |
| 25 | IT110221 | 100 | IT172683 | 175 | IT212153 | 250 | IT172452 |
| 26 | IT110223 | 101 | IT172684 | 176 | IT212154 | 251 | IT172539 |
| 27 | IT110234 | 102 | IT172693 | 177 | IT212155 | 252 | IT172555 |
| 28 | IT110235 | 103 | IT172694 | 178 | IT212156 | 253 | IT172659 |
| 29 | IT110237 | 104 | IT172695 | 179 | IT212157 | 254 | IT172667 |
| 30 | IT110238 | 105 | IT172696 | 180 | IT212158 | 255 | IT172787 |
| 31 | IT110240 | 106 | IT172700 | 181 | IT212159 | 256 | IT172815 |
| 32 | IT110241 | 107 | IT172702 | 182 | IT212160 | 257 | IT172817 |
| 33 | IT110242 | 108 | IT172705 | 183 | IT212161 | 258 | IT172818 |
| 34 | IT110244 | 109 | IT172710 | 184 | IT212162 | 259 | IT172821 |
| 35 | IT110245 | 110 | IT172711 | 185 | IT212163 | 260 | IT172822 |
| 36 | IT110246 | 111 | IT172715 | 186 | IT212164 | 261 | IT172826 |
| 37 | IT121450 | 112 | IT172716 | 187 | IT212165 | 262 | IT172827 |
| 38 | IT144017 | 113 | IT172718 | 188 | IT212166 | 263 | IT172828 |
| 39 | IT171372 | 114 | IT172726 | 189 | IT212179 | 264 | IT181793 |
| 40 | IT171373 | 115 | IT172729 | 190 | IT212181 | 265 | IT181796 |
| 41 | IT171374 | 116 | IT172730 | 191 | IT212194 | 266 | IT181800 |
| 42 | IT171376 | 117 | IT172738 | 192 | IT212198 | 267 | IT181803 |
| 43 | IT171377 | 118 | IT172739 | 193 | IT212203 | 268 | IT181805 |
| 44 | IT172392 | 119 | IT172743 | 194 | IT212204 | 269 | IT181809 |
| 45 | IT172393 | 120 | IT172757 | 195 | IT184834 | 270 | IT181815 |
| 46 | IT172394 | 121 | IT172820 | 196 | IT184884 | 271 | IT181816 |
| 47 | IT172395 | 122 | IT172825 | 197 | IT184907 | 272 | IT181818 |
| 48 | IT172397 | 123 | IT175811 | 198 | IT184917 | 273 | IT181820 |
| 49 | IT172398 | 124 | IT181765 | 199 | IT184929 | 274 | IT181821 |
| 50 | IT172399 | 125 | IT181766 | 200 | IT318096 | 275 | IT181822 |
| 51 | IT172402 | 126 | IT181771 | 201 | IT318097 | 276 | IT181823 |
| 52 | IT172403 | 127 | IT181774 | 202 | IT318802 | 277 | IT181825 |

|     |          |     |          |     |          |     |          |
|-----|----------|-----|----------|-----|----------|-----|----------|
| 53  | IT172405 | 128 | IT181775 | 203 | IT318803 | 278 | IT181826 |
| 54  | IT172407 | 129 | IT181777 | 204 | IT318804 | 279 | IT181827 |
| 55  | IT172408 | 130 | IT181789 | 205 | IT318805 | 280 | IT181830 |
| 56  | IT172413 | 131 | IT181791 | 206 | IT318806 | 281 | IT181833 |
| 57  | IT172418 | 132 | IT181795 | 207 | IT318807 | 282 | IT181834 |
| 58  | IT172419 | 133 | IT185464 | 208 | IT318808 | 283 | IT181837 |
| 59  | IT172420 | 134 | IT185678 | 209 | IT318809 | 284 | IT181838 |
| 60  | IT172421 | 135 | IT185682 | 210 | IT318810 | 285 | IT184826 |
| 61  | IT172422 | 136 | IT191602 | 211 | IT318811 | 286 | IT185676 |
| 62  | IT172423 | 137 | IT191603 | 212 | IT321093 | 287 | IT185679 |
| 63  | IT172426 | 138 | IT191604 | 213 | IT321094 | 288 | IT185680 |
| 64  | IT172427 | 139 | IT191605 | 214 | IT334404 | 289 | IT185681 |
| 65  | IT172431 | 140 | IT191606 | 215 | IT334405 | 290 | IT201361 |
| 66  | IT172458 | 141 | IT191607 | 216 | IT334406 | 291 | IT201362 |
| 67  | IT172467 | 142 | IT191608 | 217 | IT334407 | 292 | IT201363 |
| 68  | IT172469 | 143 | IT191609 | 218 | IT334408 | 293 | IT201364 |
| 69  | IT172479 | 144 | IT191610 | 219 | IT334409 | 294 | IT201370 |
| 70  | IT172484 | 145 | IT191613 | 220 | IT30864  | 295 | IT201371 |
| 71  | IT172502 | 146 | IT191614 | 221 | IT30871  | 296 | IT202680 |
| 72  | IT172507 | 147 | IT191615 | 222 | IT30872  | 297 | IT208799 |
| 73  | IT172508 | 148 | IT191619 | 223 | IT30873  | 298 | IT210195 |
| 74  | IT172517 | 149 | IT191620 | 224 | IT30878  | 299 | IT210196 |
| 75  | IT172528 | 150 | IT191621 | 225 | IT30879  | 300 | IT226447 |
| 301 | IT250592 |     |          |     |          |     |          |

---

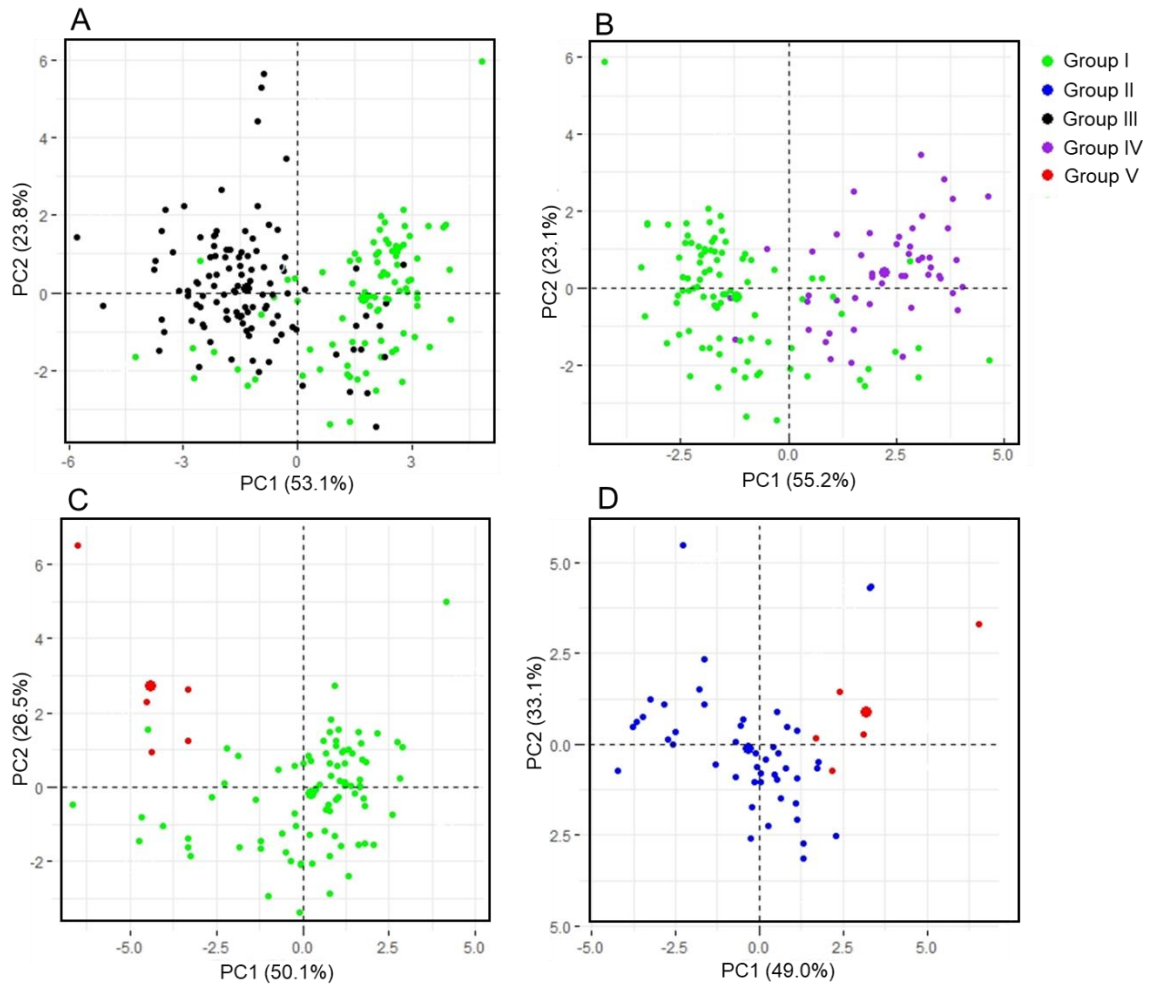

**Figure S1.** Principal component biplots of the total oil content and individual and total fatty acid contents of the different 100-seed weight groups. Group I, Group II, Group III, Group IV, and Group V represent the genotypes have a 100-seed weight of 25–45 g, 45–65 g, 65–85 g, 85–105 g, and 105–125 g, respectively. (A) Loading plots of Groups I and III, (B) Loading plots of Groups I and IV, (C) Loading plots of Groups I and V, (D) Loading plots of Groups II and V.

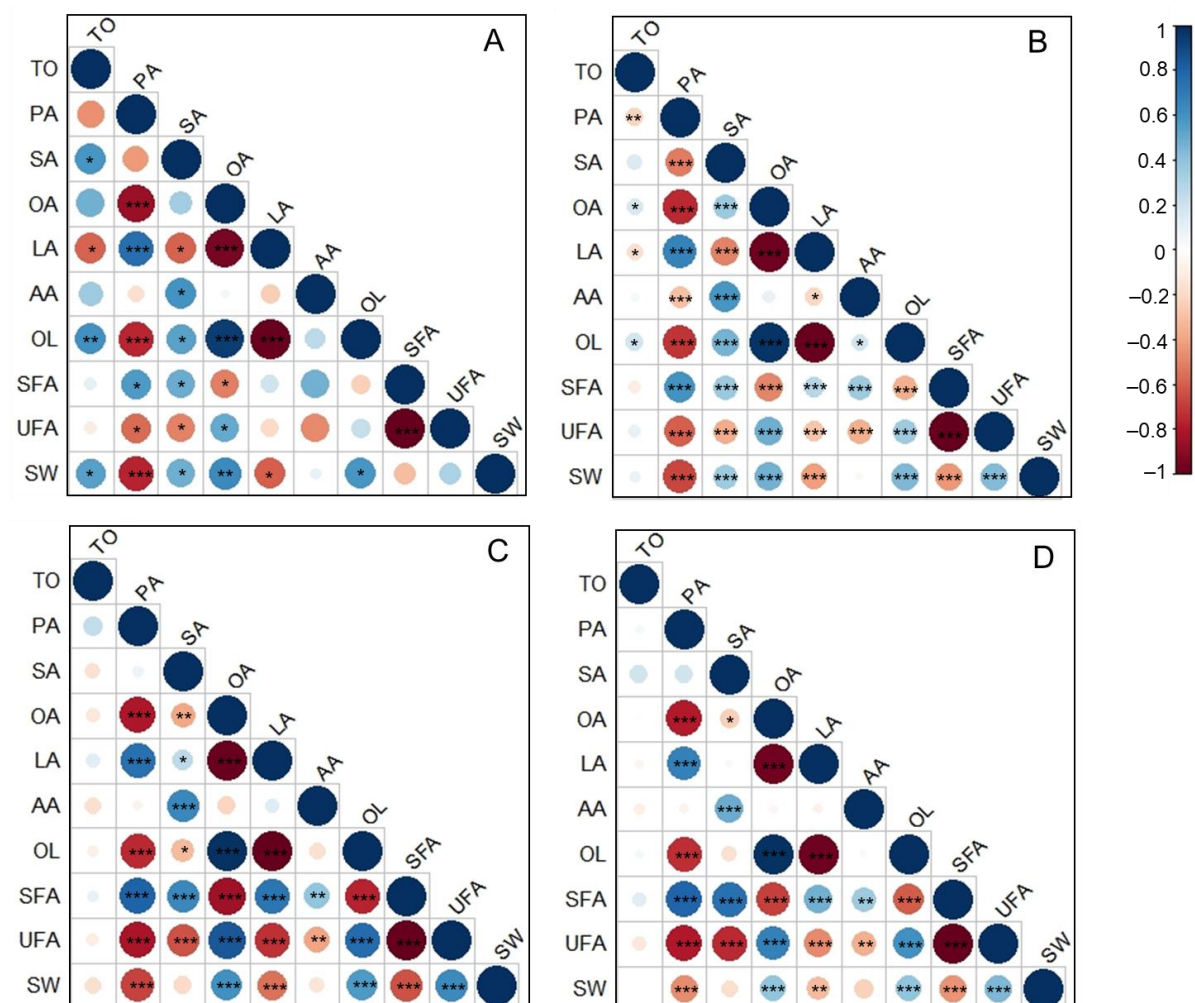

**Figure S2.** Correlation coefficients of seed weight, total oil content, and individual and total fatty acid contents for the (A) cultivar (n = 17), (B) breeding line (n = 151), (C) landrace (n = 61), and (D) unknown (n = 72) accession types. TO = total oil, PA = palmitic acid, SA = stearic acid, OA = oleic acid, LA = linoleic acid, AA = arachidic acid, OL = oleic acid to linoleic acid ratio, SFA = total saturated fatty acid, UFA = total unsaturated fatty acid, SW = 100-seed weight. \*, \*\*, \*\*\* represent significant at  $p < 0.05$ , 0.01, 0.001, respectively.



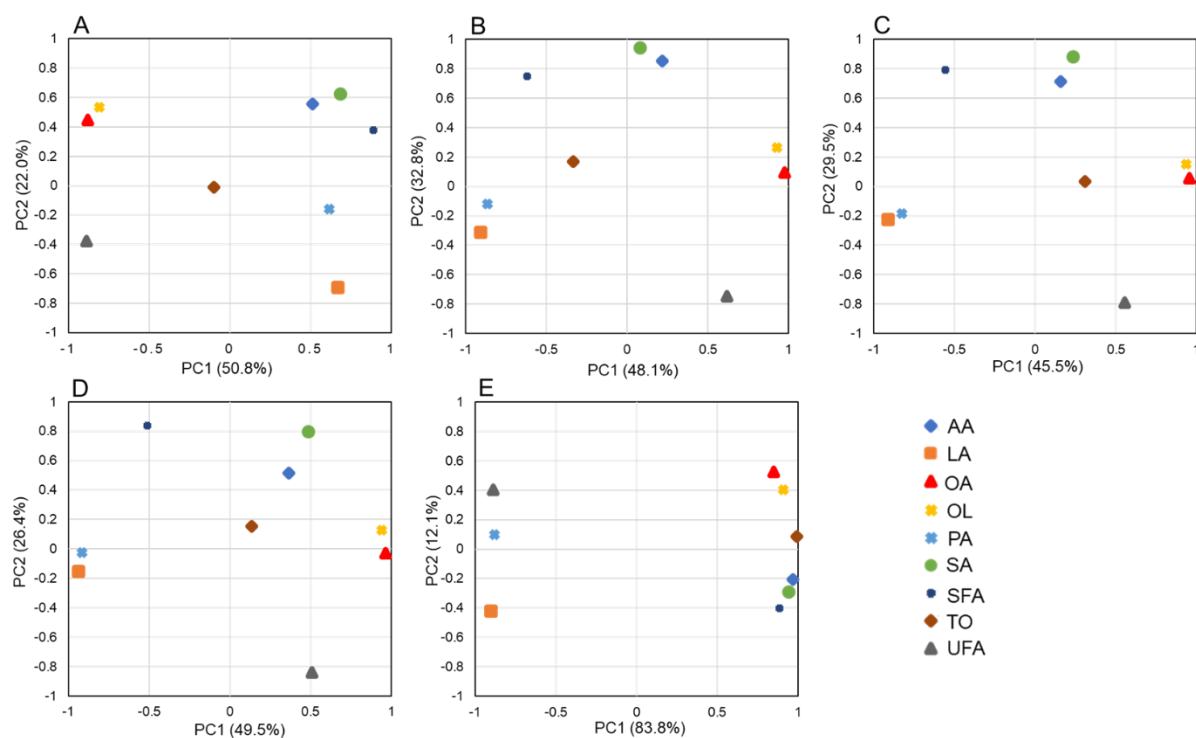

**Figure S3.** Principal component analysis loading plots of targeted metabolites for the different 100-seed weight groups. (A) Group I, (B) Group II, (C) Group III, (D) Group IV, (E) Group V. Group I, Group II, Group III, Group IV, and Group V represent the genotypes have a 100-seed weight of 25–45 g, 45–65 g, 65–85 g, 85–105 g, and 105–125 g, respectively. TO = total oil, PA = palmitic acid, SA = stearic acid, OA = oleic acid, LA = linoleic acid, AA = arachidic acid, OL = oleic acid to linoleic acid ratio, SFA = total saturated fatty acid, UFA = total unsaturated fatty acid.
